# Supplementary material for: Characterization of a newly isolated phage infecting pathogenic Escherichia coli and analysis of its mosaic structural genes
Source: PubMed Central journal article supplement (PMC5967307; doi:10.1038/s41598-018-26004-4), 2018-05-24
Supplement: 41598_2018_26004_MOESM1_ESM.pdf [file 41598_2018_26004_MOESM1_ESM.pdf]

**Characterization of a newly isolated phage infecting pathogenic  
*Escherichia coli* and analysis of its mosaic structural genes**

Qin Peng<sup>1</sup>, Yihui Yuan<sup>2,\*</sup>

<sup>1</sup> Ministry of Education Key Laboratory for Ecology of Tropical Islands, College of Life Sciences, Hainan Normal University, Haikou 570100, P. R. China

<sup>2</sup> State Key Laboratory of Marine Resource Utilization in South China Sea, Hainan University, Haikou 570228, China.

\*Correspondence and requests for materials should be addressed to Y. Y. (yyhheda@126.com).

Table S1. Genome annotations of phage vB\_EcoS\_HSE2.

| Gene accession | Direction | Nucleotide position |       | Length (amino acid) | Function                     | Best match                                      | Similarity | E-value   |
|----------------|-----------|---------------------|-------|---------------------|------------------------------|-------------------------------------------------|------------|-----------|
|                |           | start               | end   |                     |                              |                                                 |            |           |
| gp01           | +         | 11                  | 1093  | 360                 | tail fiber protein           | <i>Salmonella</i> phage STP03 orf2              | 83%        | 0         |
| gp02           | +         | 1106                | 3313  | 735                 | tailspike protein            | <i>Salmonella</i> phage SE40 protein ARK07384.1 | 11.80%     | 2.00E-42  |
| gp03           | -         | 5139                | 3715  | 474                 | helicase                     | <i>Escherichia</i> phage LAB-2017 orf64         | 99%        | 0         |
| gp04           | -         | 5651                | 5367  | 94                  | VRR-NUC domain protein       | <i>Escherichia</i> phage LAB-2017 orf62         | 97%        | 4.00E-61  |
| gp05           | -         | 8136                | 5932  | 734                 | DNA polymerase               | <i>Salmonella</i> phage ST4 proteinAFO70776.1   | 89.10%     | 0         |
| gp06           | +         | 6158                | 6634  | 158                 | hypothetical protein         | No hits                                         |            |           |
| gp07           | -         | 8411                | 8133  | 92                  | hypothetical protein         | <i>Escherichia</i> phage vB_EcoP_SU10 orf55     | 57%        | 7.00E-26  |
| gp08           | -         | 9097                | 8471  | 208                 | Helix-destabilizing protein  | <i>Escherichia</i> phage K1-dep(4) orf39        | 99%        | 2.00E-151 |
| gp09           | -         | 9675                | 9184  | 163                 | HNH endonuclease             | <i>Enterobacter</i> phage phiEap-2 orf60        | 49.50%     | 4.00E-48  |
| gp10           | -         | 10913               | 9672  | 413                 | nuclease superfamily protein | <i>Escherichia</i> phage G AB-2017 orf58        | 89%        | 0.00E+00  |
| gp11           | -         | 11182               | 10910 | 90                  | hypothetical protein         | <i>Salmonella</i> phage Jersey orf47            | 97%        | 1.00E-60  |
| gp12           | -         | 11726               | 11226 | 166                 | hypothetical protein         | <i>Salmonella</i> phage f18SE orf3              | 74%        | 2.00E-71  |
| gp13           | +         | 11851               | 12066 | 71                  | transcriptional repressor    | <i>Escherichia</i> phage LAB-2017 orf53         | 99%        | 3.00E-41  |
| gp14           | -         | 14322               | 12085 | 745                 | putative helicase-primase    | <i>Escherichia</i> phage K1ind1 orf35           | 94%        | 0         |
| gp15           | -         | 14614               | 14381 | 77                  | replication protein          | <i>Escherichia</i> phage K1ind1 orf36           | 95%        | 3.00E-44  |
| gp16           | +         | 15371               | 15688 | 105                 | hypothetical protein         | No hits                                         |            |           |
| gp17           | -         | 16976               | 16617 | 119                 | hypothetical protein         | No hits                                         |            |           |

|      |   |       |       |     |                             |                                          |        |           |
|------|---|-------|-------|-----|-----------------------------|------------------------------------------|--------|-----------|
| gp18 | + | 17028 | 17384 | 118 | hypothetical protein        | <i>Escherichia</i> phage K1-dep(1) orf40 | 49%    | 2.00E-45  |
| gp19 | + | 17366 | 17584 | 72  | hypothetical protein        | <i>Salmonella</i> phage BPS11Q3 orf25    | 90%    | 2.00E-40  |
| gp20 | + | 17587 | 17841 | 84  | hypothetical protein        | <i>Escherichia</i> phage G AB-2017 orf39 | 52%    | 6.00E-14  |
| gp21 | + | 17841 | 18044 | 67  | hypothetical protein        | <i>Escherichia</i> phage phAPEC8 orf36   | 48.90% | 6.00E-12  |
| gp22 | + | 18028 | 18309 | 93  | hypothetical protein        | <i>Escherichia</i> phage K1ind1 orf39    | 87%    | 1.00E-53  |
| gp23 | - | 18605 | 18360 | 81  | hypothetical protein        | No hits                                  |        |           |
| gp24 | + | 18686 | 18958 | 90  | holin-like                  | <i>Escherichia</i> phage G AB-2017 orf36 | 96%    | 4.00E-57  |
| gp25 | + | 18921 | 19421 | 166 | endolysin                   | <i>Escherichia</i> phage K1-ind(3) orf41 | 94%    | 5.00E-111 |
| gp26 | + | 20295 | 20534 | 79  | hypothetical protein        | <i>Escherichia</i> phage K1ind1 orf44    | 72%    | 1.00E-33  |
| gp27 | + | 20455 | 20703 | 82  | hypothetical protein        | <i>Escherichia</i> phage L AB-2017 orf30 | 70.81% | 2.00E-35  |
| gp28 | - | 20943 | 20719 | 74  | hypothetical protein        | No hits                                  |        |           |
| gp29 | + | 20873 | 21109 | 78  | transcriptional regulator   | <i>Escherichia</i> phage K1-dep(4) orf48 | 100%   | 5.00E-51  |
| gp30 | + | 21368 | 21928 | 186 | terminase small subunit     | <i>Escherichia</i> phage K1-ind(3) orf46 | 98%    | 1.00E-130 |
| gp31 | + | 21925 | 23175 | 416 | terminase                   | <i>Escherichia</i> phage K1-dep(1) orf1  | 99%    | 0.00E+00  |
| gp32 | + | 23187 | 24680 | 497 | putative structural protein | <i>Escherichia</i> phage L AB-2017 orf24 | 97%    | 0.00E+00  |
| gp33 | + | 24717 | 25793 | 358 | head protein                | <i>Escherichia</i> phage K1-ind(2) orf3  | 96%    | 0.00E+00  |
| gp34 | + | 25793 | 26254 | 153 | tail protein                | <i>Escherichia</i> phage K1-ind(3) orf5  | 94%    | 6.00E-98  |
| gp35 | - | 26695 | 26351 | 114 | hypothetical protein        | No hits                                  |        | 3.00E-19  |
| gp36 | + | 27168 | 27554 | 128 | spanin                      | <i>Escherichia</i> phage K1-ind(3) orf6  | 95%    | 2.00E-82  |
| gp37 | - | 27738 | 27469 | 89  | hypothetical protein        | No hits                                  |        |           |
| gp38 | + | 27743 | 28369 | 208 | hypothetical protein        | <i>Escherichia</i> phage G AB-2017 orf20 | 100%   | 2.00E-145 |
| gp39 | + | 28376 | 29344 | 322 | major capsid                | <i>Escherichia</i> phage                 | 97%    | 0         |

|      |   |       |       |     |                                                             |                            |        |          |  |
|------|---|-------|-------|-----|-------------------------------------------------------------|----------------------------|--------|----------|--|
| gp40 | + | 29573 | 30085 | 170 | protein                                                     | K1-dep(1) orf8             |        |          |  |
|      |   |       |       |     | hypothetical                                                | <i>Escherichia</i> phage   | 95%    | 3.00E-   |  |
| gp41 | + | 30088 | 30702 | 204 | protein                                                     | K1-ind(3) orf13            |        | 112      |  |
|      |   |       |       |     | hypothetical                                                | <i>Escherichia</i> phage   | 91%    | 7.00E-   |  |
| gp42 | + | 30702 | 31061 | 119 | protein                                                     | L AB-2017 orf15            |        | 129      |  |
|      |   |       |       |     | prophage ATP-binding sugar transporter protein              | <i>Escherichia</i> phage   | 96%    | 7.00E-78 |  |
| gp43 | + | 31058 | 31453 | 131 | tail protein                                                | G AB-2017 orf16            |        |          |  |
|      |   |       |       |     |                                                             | <i>Escherichia</i> phage   | 98%    | 2.00E-88 |  |
| gp44 | + | 31450 | 31866 | 138 | hypothetical                                                | K1-ind(3) ORF15B           |        |          |  |
|      |   |       |       |     | protein                                                     | <i>Escherichia</i> phage   | 97%    | 4.00E-94 |  |
| gp45 | + | 31869 | 33035 | 388 | tail protein                                                | K1-dep(4) orf16            |        |          |  |
|      |   |       |       |     |                                                             | <i>Escherichia</i> phage   | 97%    | 0        |  |
| gp46 | - | 32560 | 31910 | 216 | hypothetical                                                | K1-dep(1) orf14B           |        |          |  |
|      |   |       |       |     | protein                                                     | No hits                    |        |          |  |
| gp47 | - | 33293 | 33063 | 76  | hypothetical                                                | Salmonella phage           | 92%    | 7.00E-46 |  |
|      |   |       |       |     | protein                                                     | FSL SP-101 protein         |        |          |  |
| gp48 | - | 33777 | 33307 | 156 | HNH                                                         | SP101_00095                |        |          |  |
|      |   |       |       |     | endonuclease                                                | <i>Salmonella</i> phage    | 45.08% | 2.00E-33 |  |
| gp49 | - | 34904 | 33774 | 376 | calcineurin-like phosphoesterase superfamily domain protein | L13 orf2                   |        |          |  |
|      |   |       |       |     |                                                             | <i>Escherichia</i> phage P | 95.04% | 0        |  |
| gp50 | - | 35149 | 34943 | 68  | hypothetical                                                | AB-2017 orf12              |        |          |  |
|      |   |       |       |     | protein                                                     | <i>Escherichia</i> phage   | 92%    | 6.00E-36 |  |
| gp51 | + | 35302 | 35718 | 138 | hypothetical                                                | K1-dep(4) orf21            |        |          |  |
|      |   |       |       |     | protein                                                     | <i>Salmonella</i> phage    | 92%    | 2.00E-89 |  |
| gp52 | - | 36043 | 35615 | 142 | hypothetical                                                | L13 orf11                  |        |          |  |
|      |   |       |       |     | protein                                                     | No hits                    |        |          |  |
| gp53 | + | 36076 | 38412 | 778 | tape measure                                                | <i>Salmonella</i> phage    | 82%    | 0        |  |
|      |   |       |       |     | protein                                                     | SETP7 orf26                |        |          |  |
| gp54 | - | 37049 | 36477 | 190 | hypothetical                                                | No hits                    |        |          |  |
|      |   |       |       |     | protein                                                     |                            |        |          |  |
| gp55 | + | 38416 | 38910 | 164 | hypothetical                                                | <i>Serratia</i> phage Eta  | 82%    | 5.00E-97 |  |
|      |   |       |       |     | protein                                                     | orf64                      |        |          |  |
| gp56 | + | 38907 | 39422 | 171 | hypothetical                                                | <i>Salmonella</i> phage    | 92%    | 2.00E-   |  |
|      |   |       |       |     | protein                                                     | wksl3 protein              |        | 114      |  |
| gp57 | + | 39419 | 39784 | 121 | peptidoglycan endopeptidase                                 | AFO12377.1                 |        |          |  |
|      |   |       |       |     |                                                             | <i>Salmonella</i> phage    | 79%    | 2.00E-67 |  |
| gp58 | - | 40583 | 40257 | 108 | hypothetical                                                | SETP3 orf29                |        |          |  |
|      |   |       |       |     |                                                             | No hits                    |        |          |  |

---

protein

---

Table S2. Core genes among nine *Escherichia* phages.

| Protein function             | HSE2 accession | L 2017 accession | AB- G 2017 accession | AB- P 2017 accession | K1- dep(1) accession | K1- dep(4) accession | K1ind1 accession | K1ind2 accession | K1ind3 accession |
|------------------------------|----------------|------------------|----------------------|----------------------|----------------------|----------------------|------------------|------------------|------------------|
| tail fiber protein           | gp1            | AQN318<br>92.1   | AQN317<br>59.1       | AQN319<br>43.1       | ADA823<br>21.1       | ADA822<br>72.1       | ADA823<br>73.1   | ADA824<br>24.1   | ADA824<br>73.1   |
| tailspike protein            | gp2            | AQN318<br>91.1   | AQN317<br>58.1       | AQN319<br>42.1       | ADA823<br>22.1       | ADA822<br>73.1       | ADA823<br>74.1   | ADA824<br>25.1   | ADA824<br>74.1   |
| helicase                     | gp3            | AQN318<br>89.1   | AQN318<br>23.1       | AQN319<br>40.1       | ADA823<br>25.1       | ADA822<br>75.1       | ADA823<br>75.1   | ADA824<br>26.1   | ADA824<br>75.1   |
| DNA polymerase               | gp5            | AQN318<br>85.1   | AQN318<br>18.1       | AQN319<br>96.        | ADA823<br>30.1       | ADA822<br>80.1       | ADA823<br>78.1   | ADA824<br>29.1   | ADA824<br>78.1   |
| nuclease superfamily protein | gp10           | AQN318<br>82.1   | AQN318<br>15.1       | AQN319<br>93.1       | ADA823<br>32.1       | ADA822<br>82.1       | ADA823<br>79.1   | ADA824<br>31.1   | ADA824<br>80.1   |
| hypothetical protein         | gp12           | AQN318<br>79.1   | AQN318<br>11.1       | AQN319<br>91.1       | ADA823<br>34.1       | ADA822<br>84.1       | ADA823<br>82.1   | ADA824<br>32.1   | ADA824<br>81.1   |
| putative helicase-primase    | gp14           | AQN318<br>77.1   | AQN318<br>09.1       | AQN319<br>89.1       | ADA823<br>36.1       | ADA822<br>86.        | ADA823<br>83.1   | ADA824<br>33.1   | ADA824<br>82.1   |
| hypothetical protein         | gp18           | AQN318<br>65.1   | AQN317<br>97.1       | AQN319<br>82.1       | ADA823<br>38.1       | ADA822<br>88.1       | ADA823<br>86.1   | ADA824<br>35.1   | ADA824<br>84.1   |
| holin-like                   | gp24           | AQN318<br>61.1   | AQN317<br>93.1       | AQN319<br>78.1       | ADA823<br>41.1       | ADA822<br>91.1       | ADA823<br>89.1   | ADA824<br>38.1   | ADA824<br>87.1   |
| endolysin                    | gp25           | AQN318<br>60.1   | AQN317<br>92.1       | AQN319<br>77.1       | ADA823<br>42.1       | ADA822<br>92.1       | ADA823<br>90.1   | ADA824<br>39.1   | ADA824<br>88.1   |
| transcriptional regulator    | gp29           | AQN318<br>53.1   | AQN317<br>86.1       | AQN319<br>71.1       | ADA823<br>44.1       | ADA822<br>94.1       | ADA823<br>95.1   | ADA824<br>43.1   | ADA824<br>92.1   |
| DNA-packaging protein        | gp30           | AQN318<br>51.1   | AQN317<br>84.1       | AQN319<br>68.1       | ADA823<br>45.1       | ADA822<br>95.1       | ADA823<br>96.1   | ADA824<br>44.1   | ADA824<br>93.1   |
| terminase                    | gp31           | AQN318<br>50.1   | AQN317<br>83.1       | AQN319<br>67.1       | ADA822<br>96.1       | ADA822<br>44.1       | ADA823<br>46.1   | ADA823<br>97.1   | ADA824<br>45.1   |
| putative structural protein  | gp32           | AQN318<br>49.1   | AQN317<br>82.1       | AQN319<br>66.1       | ADA822<br>97.1       | ADA822<br>45.1       | ADA823<br>47.1   | ADA823<br>98.1   | ADA824<br>46.1   |
| head protein                 | gp33           | AQN318<br>48.1   | AQN317<br>81.1       | AQN319<br>65.1       | ADA822<br>98.1       | ADA822<br>46.1       | ADA823<br>48.1   | ADA823<br>99.1   | ADA824<br>47.1   |
| tail protein                 | gp34           | AQN318<br>47.1   | AQN317<br>80.1       | AQN319<br>64.1       | ADA822<br>99.1       | ADA822<br>47.1       | ADA823<br>49.1   | ADA824<br>00.1   | ADA824<br>49.1   |
| spanin                       | gp36           | AQN318<br>46.1   | AQN317<br>79.1       | AQN319<br>63.1       | ADA823<br>00.1       | ADA822<br>48.1       | ADA823<br>50.1   | ADA824<br>01.1   | ADA824<br>50.1   |

|                                                                                  |      |                |                |                |                |                |                |                |                |
|----------------------------------------------------------------------------------|------|----------------|----------------|----------------|----------------|----------------|----------------|----------------|----------------|
| hypothetical<br>al protein                                                       | gp38 | AQN318<br>44.1 | AQN317<br>77.1 | AQN319<br>61.1 | ADA823<br>02.1 | ADA822<br>50.1 | ADA823<br>52.1 | ADA824<br>03.1 | ADA824<br>52.1 |
| hypothetical<br>al protein                                                       | gp40 | AQN318<br>41.1 | AQN317<br>74.1 | AQN319<br>58.1 | ADA823<br>05.1 | ADA822<br>56.1 | ADA823<br>57.1 | ADA824<br>08.1 | ADA824<br>57.1 |
| hypothetical<br>al protein                                                       | gp41 | AQN318<br>40.1 | AQN317<br>73.1 | AQN319<br>57.1 | ADA823<br>06.1 | ADA822<br>59.1 | ADA823<br>58.1 | ADA824<br>09.1 | ADA824<br>58.1 |
| prophage<br>ATP-<br>binding<br>sugar<br>transporte<br>r protein<br>tail protein  | gp42 | AQN318<br>39.1 | AQN317<br>73.1 | AQN319<br>56.1 | ADA823<br>07.1 | ADA822<br>57.1 | ADA823<br>59.1 | ADA824<br>10.1 | ADA824<br>59.1 |
| hypothetical<br>al protein<br>tail protein                                       | gp43 | AQN318<br>38.1 | AQN317<br>72.1 | AQN319<br>55.1 | ADA823<br>08.1 | ADA822<br>58.1 | ADA823<br>60.1 | ADA824<br>11.1 | ADA824<br>60.1 |
| hypothetical<br>al protein<br>tail protein                                       | gp44 | AQN318<br>37.1 | AQN317<br>71.1 | AQN319<br>54.1 | ADA823<br>09.1 | ADA822<br>60.1 | ADA823<br>61.1 | ADA824<br>12.1 | ADA824<br>61.1 |
| calcineuri<br>n-like<br>phosphoes<br>terase<br>superfamil<br>y domain<br>protein | gp45 | AQN318<br>36.1 | AQN317<br>70.1 | AQN319<br>53.1 | ADA823<br>10.1 | ADA822<br>61.1 | ADA823<br>62.1 | ADA824<br>13.1 | ADA824<br>62.1 |
| hypothetical<br>al protein<br>tape<br>measure<br>protein                         | gp49 | AQN318<br>33.1 | AQN317<br>67.1 | AQN319<br>50.1 | ADA823<br>13.1 | ADA822<br>64.1 | ADA823<br>65.1 | ADA824<br>16.1 | ADA824<br>65.1 |
| hypothetical<br>al protein                                                       | gp51 | AQN318<br>31.1 | AQN317<br>65.1 | AQN319<br>48.1 | ADA823<br>15.1 | ADA822<br>66.1 | ADA823<br>67.1 | ADA824<br>18.1 | ADA824<br>67.1 |
| hypothetical<br>al protein                                                       | gp53 | AQN318<br>29.1 | AQN317<br>63.1 | AQN319<br>47.1 | ADA823<br>17.1 | ADA822<br>68.1 | ADA823<br>69.1 | ADA824<br>20.1 | ADA824<br>69.1 |
| hypothetical<br>al protein                                                       | gp55 | AQN318<br>28.1 | AQN317<br>62.1 | AQN319<br>46.1 | ADA823<br>18.1 | ADA822<br>69.1 | ADA823<br>70.1 | ADA824<br>21.1 | ADA824<br>70.1 |
| hypothetical<br>al protein                                                       | gp56 | AQN318<br>27.1 | AQN317<br>61.1 | AQN319<br>45.1 | ADA823<br>19.1 | ADA822<br>70.1 | ADA823<br>71.1 | ADA824<br>22.1 | ADA824<br>71.1 |
| peptidogly<br>can<br>endopepti<br>dase                                           | gp57 | AQN318<br>26.1 | AQN317<br>60.1 | AQN319<br>44.1 | ADA823<br>20.1 | ADA822<br>71.1 | ADA823<br>72.1 | ADA824<br>23.1 | ADA824<br>72.1 |
